# Supplementary material
Source: PubMed Central journal article supplement (PMC3375943)
Supplement: supp_pp.112.196816_196816Supplemental_Figures.pdf [file supp_pp.112.196816_196816Supplemental_Figures.pdf]

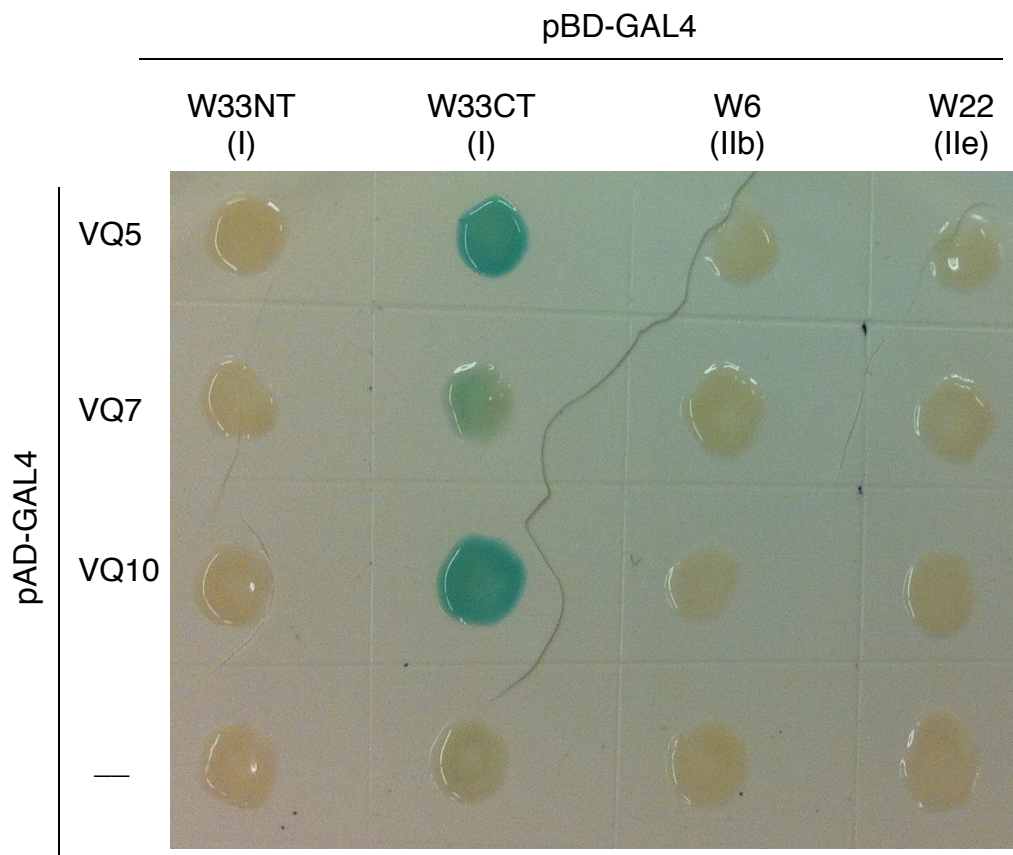

**Supplemental Figure S1.** Interaction of *Arabidopsis* VQ5, VQ7 and VQ10 with WRKY proteins in yeast cells.

The Gal4 DNA BD-WRKY domain bait vectors were contrtransformed with the activation domain (AD)-VQ fusion prey vectors into yeast cells and the transformant cells were assayed for *LacZ* reporter gene expression. The empty pAD prey vector was used as negative control (-).

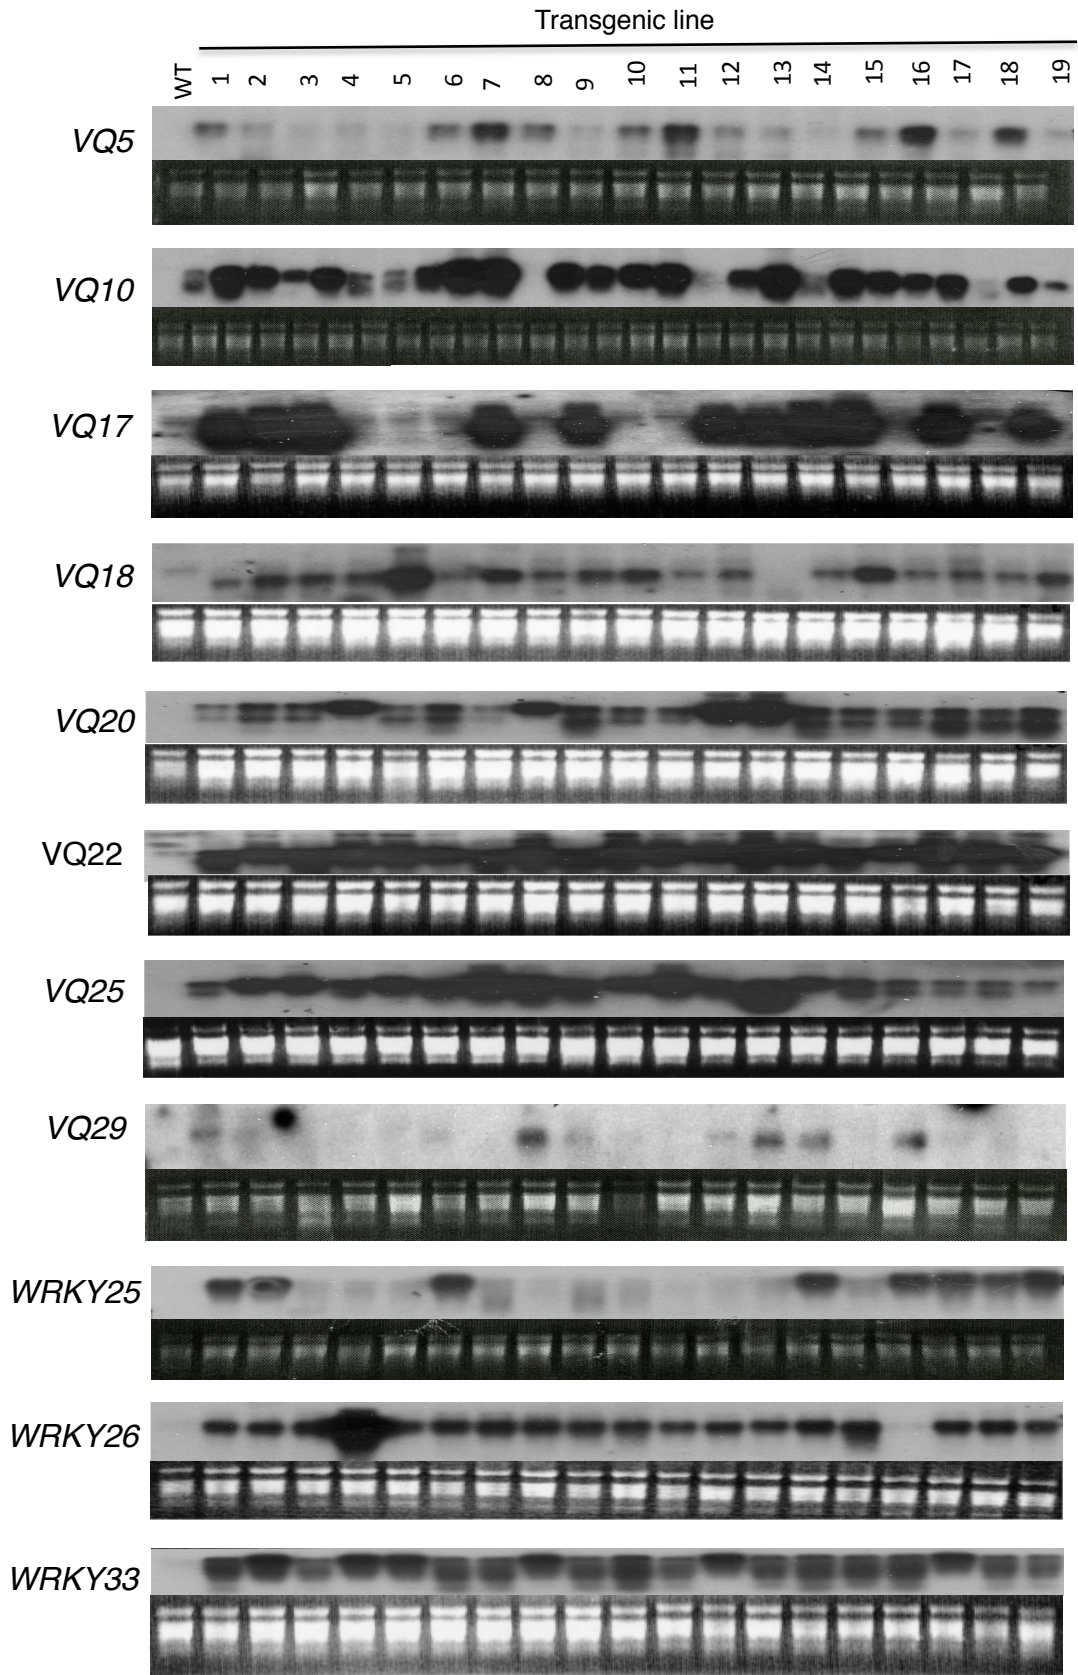

**Supplemental Figure S2.** VQ and WRKY gene overexpression in transgenic plants. RNA samples were prepared from leaves of 5-week-old wild type (WT) and F1 transgenic lines and probed with a gene-specific probe. Ethidium bromide staining of rRNA is shown for the assessment of equal loading.
