# Supplementary material
Source: PubMed Central journal article supplement (PMC3375943)
Supplement: supp_pp.112.196816_196816Supplemental_tables.pdf [file supp_pp.112.196816_196816Supplemental_tables.pdf]

**Supplemental Table S1.** Primers for pAD-Gal fusion and overexpression constructs

| AtVQ<br>NAME | PRIMERS*                                 |                                            |
|--------------|------------------------------------------|--------------------------------------------|
|              | FORWARD                                  | REVERSE                                    |
| VQ1          | <u>AGCCTCGAGATGTCTGCAGGAGTGAGATC</u>     | <u>AGCTCTAGACGAATTATTAGTCTAGTCAATGGTCT</u> |
| VQ2          | <u>AGCGGATCCATGGATAATAGATCGCCAAG</u>     | <u>AGCCTCGAGTCAAGAATCAAAGAAATTGTTGAAA</u>  |
| VQ3          | <u>AGCGGATCCATGGATAATAGATCGCCAAGA</u>    | <u>AGCCTCGAGTCAAGAATCAAAGAAATTGTTGAAA</u>  |
| VQ4          | <u>AGCCTCGAGATGGAGAATTCACCGAGATAC</u>    | <u>AGCTCTAGATTCAAGAAGTAGAAGCTGATGAAGAA</u> |
| VQ5          | <u>AGCCTCGAGATGTATCAGCGACCACAAAATG</u>   | <u>AGCACTAGTATTTGAAATCATGCGAACATTA</u>     |
| VQ6          | <u>AGCGGATCCATGGATAGGACTTGTGGTATT</u>    | <u>AGCCTCGAGGGAGCATCTTAGTAACCTCTCCA</u>    |
| VQ7          | <u>AGCGGATCCATGGATTCTTGTAACAGTGGAAG</u>  | <u>AGCCTCGAGTTAATTATTGGAATCTGTAGGGCAA</u>  |
| VQ8          | <u>AGCGGATCCATGGTTCCAACAAGATGCAA</u>     | <u>AGCCTCGAGTTATTTCGGACTTAAAAACCAAGG</u>   |
| VQ9          | <u>AGCCTCGAGATGGATAAGAGCTGTAACTC</u>     | <u>AGCTCTAGATGATCAATGACCTTTGTATTTAGGG</u>  |
| VQ10         | <u>AGCCTCGAGATGTCTGGAAGAGGGAAAGT</u>     | <u>AGCTCTAGAAATGACTCAATATTCTGACCATAGTT</u> |
| VQ11         | <u>AGCCTCGAGATGAGTCACCAGCAGCCG</u>       | <u>AGCTCTAGACGTTCTAAATTAAGACTAAGAGTCTC</u> |
| VQ12         | <u>AGCCTCGAGATGGAAGCTACTTCACAACCA</u>    | <u>AGCTCTAGACTACCATCTTGATAGATTAGCAGGAC</u> |
| VQ13         | <u>AGCGGATCCATGGAGAAATCACCAAGATACA</u>   | <u>AGCCTCGAGTCAATGATCATGAGGTGAAGG</u>      |
| VQ14         | <u>AGCCTCGAGATGGATAGGCCTAGACAAAATG</u>   | <u>AGCTCTAGAAAAAGAGCACCTAGTAATCATTCCA</u>  |
| VQ15         | <u>AGCCTCGAGATGGTGACTTCGGAGGGATT</u>     | <u>AGCTCTAGACAGATCACATAACCTTCCACGA</u>     |
| VQ17         | <u>AGCCTCGAGATGGAATTTGAAGCTACTACTGTT</u> | <u>AGCACTAGTCGTTTTTAGGCGTAATGGTGA</u>      |
| VQ18         | <u>AGCGGATCCATGGAGATTACTCAATATCAAAGT</u> | <u>AGCCTCGAGTTAAGACGAATTATGAGCCTTTGT</u>   |
| VQ19         | <u>AGCGGATCCATGGAGATTTCAACAAACCCA</u>    | <u>AGCCTCGAGTCTACATCTCCGGCGATAATCT</u>     |
| VQ20         | <u>AGCCTCGAGATGAGCTCAACGTACAAGGAC</u>    | <u>AGCTCTAGATTAAAAATCGCGAAACTCCGTC</u>     |
| VQ22         | <u>AGCCTCGAGATGGCTAACCCCAACGAGT</u>      | <u>AGCTCTAGACTCATTGCAACCTCGAAGAAG</u>      |
| VQ24         | <u>AGCGGATCCATGGCGTCGTCGGAGGGA</u>       | <u>AGCGTGCAGCATCACATAACTTTCCATGATTCCG</u>  |
| VQ25         | <u>AGCGGATCCATGGAAGCCACGATCTTCGA</u>     | <u>AGCCTCGAGTTAAGCGAATTGATCTGAGAAAA</u>    |
| VQ26         | <u>AGCGGATCCATGGTGAGAAATTCTATGAAGG</u>   | <u>AGCCTCGAGTTATTGTTGTTGAAGATCAAACCAT</u>  |
| VQ27         | <u>AGCCTCGAGATGGCCAACCTAACAACGA</u>      | <u>AGCACTAGTCCTAACATTTCTTCCTTTATGTTTTT</u> |
| VQ28         | <u>AGCCTCGAGATGAACAACCTTAGAGAAGACC</u>   | <u>AGCACTAGTTTATAAATCGAGATCTCTCATCATAA</u> |
| VQ29         | <u>AGCGGATCCATGGAAGCAACATCACAACAAT</u>   | <u>AGCCTCGAGGAGTAGAAGCTACCATCTGGAAAT</u>   |
| VQ30         | <u>AGCGGATCCATGGAGTCCGGTAATAGTAGTAGC</u> | <u>AGCGTGCAGCTTTATGTTCTCTGGTCCGAAGA</u>    |
| VQ31         | <u>AGCCTCGAGATGAATAGCAAAGGGAGTCAA</u>    | <u>AGCTCTAGATTTATGGTTTGCCACTCGAA</u>       |
| VQ32         | <u>AGCGGATCCATGGATGATCAGAGTAATCGTG</u>   | <u>AGCCTCGAGCCATCAGGATTATTAATACACTGCTT</u> |
| VQ33         | <u>AGCGGATCCATGGAAGTTTCAACATCATCCA</u>   | <u>AGCCTCGAGTCGTCGGGATTAAGAGTTCC</u>       |
| VQ34         | <u>ATGCCATGGAATCCGGCAATAGTAG</u>         | <u>AGCGAGCTCTCTAATCAGAAGAAGAGATCCAAGA</u>  |

\*Introduced restriction sites in the primers are underlined.

**Supplemental Table S2. Primers for pBD-Gal fusion constructs**

| WRKY<br>NAME | PRIMERS*                           |                                  |
|--------------|------------------------------------|----------------------------------|
|              | FORWARD                            | REVERSE                          |
| WRKY6        | AGCGAATTCTTTGATCAAACCGCTGAAG       | AGCGTCGACTCACATCCCGTCGTGACTAGA   |
| WRKY11       | AGCGAATTC AAGAAAAGCAGGAAAAATCG     | AGCGTCGACTCAAGCCGAGGCAAACACTA    |
| WRKY18       | ATCGAATTCCTACTGAAACATCGGACAC       | ATCGTCGACGCTTGTAGCATCCCCTTCAG    |
| WRKY22       | AGCGAATTCCTCCAATACCTCTAGATCTAAAAGA | AGCGTCGACTCAAATAGTGGTCGTGCGGAGAT |
| WRKY25CT     | ATCGAATTCGAAGGTGAAGATGAAGGGATGT    | ATCGTCGACTCACGAGCGACGTAGCGCGGT   |
| WRKY33NT     | AGCGAATTCGAACAATGGAGCCAAACCGA      | AGCGTCGACTCAAGCTTGACGATTATGATCCA |
| WRKY33CT     | ATCGAATTCGTAGTGCAGACAACGAGTGAT     | ATCGTCGACTCAGGGCATAAACGAATCGA    |
| WRKY38       | AGCGAATTCCTCCAAGAAAAGAAAGATTGA     | AGCGTCGACTCATTTCCTCGAATCGGATCATT |
| WRKY51       | AGCGAATTCAGTAAAGAGAGTGATCAGACGAAG  | AGCGTCGACTTAAGATCGAAGAAGAGAGTGTT |
| WRKY70       | ATCGAATTCCTCGGAGACGTGTACTATAGAGTCG | ATCCTCGAGGGTCACAAGTCTTGCTCTTGG   |

\*Introduced restriction sites in the primers are underlined.

**Supplemental Table 3.** Primers for quantitative RT-PCR

| VQ<br>NAME | PRIMERS               |                       |
|------------|-----------------------|-----------------------|
|            | FORWARD               | REVERSE               |
| VQ1        | TGAACCGATGAAGGTTGTCT  | GATGAATCTTTGCCACCGTA  |
| VQ2        | GGATCAGCTTATGACCGCTA  | CATGTTGGAACCTCCTTGTC  |
| VQ3        | GATCATCAAGAAGCCACCAC  | TATAATCACGGGACCAGGTG  |
| VQ4        | TTCCCATCTCTCGTTCTCAG  | AAGAAGTCGAGGCTCTGGAT  |
| VQ5        | TGGAGACCAATTCGAAGAAC  | TGTGGCATTGATTGTGTAGG  |
| VQ6        | ATGCGTTATCGTCAAAGCTC  | GTCGAACTTAGGAGTTGGCA  |
| VQ7        | ACTCCTCTTTCTTCCTCCCA  | GGGAGGAGATGAGTTTGGTT  |
| VQ8        | TGATATGCCGTTGTTACACAC | AACCAAGGGTCGAAATGAAT  |
| VQ9        | TGCAAATCAATCAAGGGAAT  | GAGGAGGACGGATCCTATGT  |
| VQ10       | CGTAGCTTCAAGACCGTTGT  | CGTGGAGCTGTCTGGTATCT  |
| VQ11       | GTCTCTCCCGTCTCTCACCT  | TCGGAAGGAAGTAGAACCT   |
| VQ12       | AGGCTAACTGGTGCAGAAGA  | GGACTAAGCAGAGGGGAAAGC |
| VQ13       | TCACTCCCACCATCTTGAAT  | TTCGAATCACTAGGGCTCTG  |
| VQ14       | GGACCACTGCAGTCACCTAC  | GGGTCCAAGACTTCCTTGTT  |
| VQ15       | CGTAACTGCCTTCTTACCGA  | CCATCTGACGAAAGTTGGAC  |
| VQ16       | TCAACGTTGCTCATAAACCA  | TGTAACGGACTTTGATGGGT  |
| VQ17       | CAACAATAGCCATGCACAAA  | TCGTGGTGATGATGATCTTG  |
| VQ18       | ACTTTCGTTCACTCGTCCAG  | GGTTTCCTCCGTTTGCTAGT  |
| VQ19       | CAACCGAAGAAACATTCTGG  | CACCACCGATCATGAGTGTA  |
| VQ20       | ACCATCCAAAGAGAGAACCC  | AGAAAGAAGACGGAGACGGT  |
| VQ21       | AGATGAGACGGTGGAAATCA  | TATCCCGGTAGAAGCTGTTG  |
| VQ22       | TCCAGAGCCTCACGTAGAAC  | AGTATTACCGGACCCGAAAG  |
| VQ23       | CGTTCGGTGAGAGAGACAGT  | TCGATGCTTCCAAAGTCATT  |
| VQ24       | CATCGATTTCGTGGCTACTCT | CGTTGGAGAGAGTTTGAGGA  |
| VQ25       | CTGCTTAAACGCAGAAGAGC  | AAGCAGAAGCATCAATGGAG  |
| VQ26       | CTTTGGTTCCCATGAACAAG  | CTTGACATCGGTGTTGATGA  |
| VQ27       | GCCTCACGTCGTACACCTAC  | TAGCGTATTGCCAAGGAGAG  |
| VQ28       | CGTATCAGTTAGGCGAGGAA  | GTCTCACGGTGGAAATCTTG  |
| VQ29       | TTGAAGAGGCCTGCAATATC  | ACGCAAATGACGAAGAACTC  |
| VQ30       | CTGCAAGCTCTTCTTCAAGC  | CTGCCGTTGTAGTAGGAGGA  |
| VQ31       | ACCTGCAAGCCTGTCACTAC  | TTCAAGCTTTGGCCTCATA   |
| VQ32       | CCAGTCTCCAGCTTCACAGT  | CGATTCGTTACTACCGCCTA  |
| VQ33       | CCCTTCAACAAGTCATCACC  | GAAGAAGCAGTGGCTGAGAG  |
| VQ34       | CACGCCAAATATCTCAAACC  | TTTAGGGTTGGCTGTGTCAT  |
